# Supplementary material for: Clinic-Integrated Smartphone App (JomPrEP) to Improve Uptake of HIV Testing and Pre-exposure Prophylaxis Among Men Who Have Sex With Men in Malaysia: Mixed Methods Evaluation of Usability and Acceptability
Source: PubMed Central journal article supplement (PMC9982718; doi:10.2196/44468), 2023-02-16

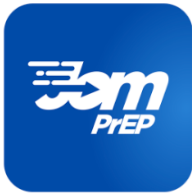

## Welcome to JomPrEP

JomPrEP is your personal one-stop shop for all your HIV prevention needs. To get started, just create an account and...  
JomPrEP!

[Create Account Now](#)

[Already registered? Sign in](#)



Silver

**366**  
Lifetime points

★

Have a nice day!  
**Roman**

### Highlights

- HIV Self-Test
- PrEP Express
- Mental Health
- Orders
- Labs
- Appointments

### My Health Trackers



**MedManager**

Never miss another dose!  
MedManager can help you track your adherence and get personalized reminders for each of your medications



**MoodTracker**

Don't let your mood affect your life!

Home Messages Notifications Resources My Account

## My Earnings



Silver

**Available Points: 516**  
Lifetime Points: 546

**Progress to The Next Tier**

351 Silver 650 Gold

- Activity**  
View recent activity
- Benefits**  
Check your benefits

[Redeem Point](#)

Home Messages Notifications Resources My Account

## My Account



**Roman Shrestha**

**546** LIFETIME POINTS

LEVEL **Silver**

### Account

- My Info**  
Update personal information
- Email**  
romanshre@gmail.com
- Phone**  
9034070387
- Shipping Address**  
Update your shipping address

### Settings

- Security & Password**  
Update your password
- Notifications**  
Choose how you want to be notified

[Logout](#)

Home Messages Notifications Resources My Account

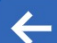

## HIV Self-Test

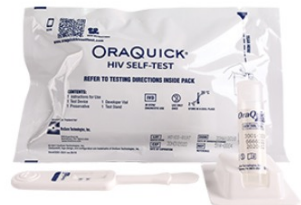

With the JomPrEP In-Home HIV Self-Test Kit, you can learn your HIV status in just 20 minutes from the comfort and privacy of your own home.

### Four reasons to use the JomPrEP In-Home HIV Self-Test Kit

- **Quick & Easy:** Get results in 20 minutes
- **Blood Free:** A swab of the gums; No needles necessary
- **Private:** Perform an HIV test when and where you want
- **Link to Care:** Our team is here to support you

Order HIV Self-Test Kit

Previous Test Results

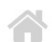

Home

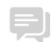

Messages

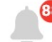

Notifications

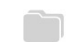

Resources

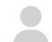

My Account

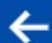

## PrEP Express

PrEP Express can get you on PrEP in a few easy steps.

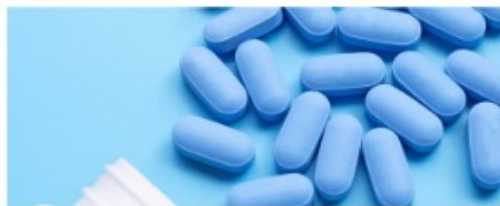

### Four reasons to use PrEP Express

- A comprehensive online visit
- No judgement
- PrEP delivered discreetly
- Personalized ongoing PrEP care

### Your Progress : Red Clinic

- ✓ SmartSex Check-up
- ✓ Blood Draw Appointment Confirmed (23 Apr 2022 09:00AM)
- ✓ e-Consult Appointment Confirmed (29 Apr 2022 15:00PM)
- Completed Blood Draw
- Completed e-Consult
- PrEP Prescription (Pick-up)

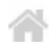

Home

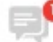

Messages

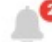

Notifications

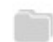

Resources

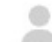

My Account

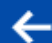

## Mental Health

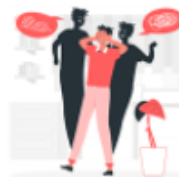

Mental health includes our emotional, psychological, and social well-being. It is an important part of our overall health and it affects how we think, feel, and act.

Depression is one of the most common and serious mental health conditions in the world. It's more than just a feeling of being sad or "blue" for a few days, depression persists and interferes with your everyday life.

Our online assessment tool can help you make sense of your feelings and could be the first step toward getting the help that's right for you. Get started and find support today!

Let's Get Started

Previous Results

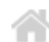

Home

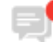

Messages

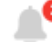

Notifications

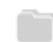

Resources

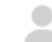

My Account

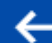

## Messages

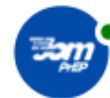

**JomPrEP Support** 21-Apr-2022 10:27 PM  
Welcome! You can ask any non-me...

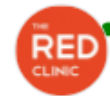

**Red Clinic** 21-Apr-2022 10:28 PM  
Welcome! You can ask any non-urg...

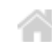

Home

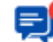

Messages

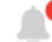

Notifications

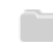

Resources

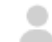

My Account

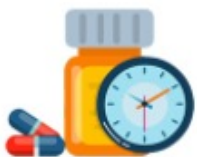

**With MedManager you can:**

- Set and receive personalized reminders
- Track your adherence with visual reports
- Receive refill reminders to restock your prescriptions

Let's Get Started

April 2022

| Sun | Mon | Tue | Wed | Thu | Fri | Sat |
|-----|-----|-----|-----|-----|-----|-----|
| 27  | 28  | 29  | 30  | 31  | 1   | 2   |
| 3   | 4   | 5   | 6   | 7   | 8   | 9   |
| 10  | 11  | 12  | 13  | 14  | 15  | 16  |
| 17  | 18  | 19  | 20  | 21  | 22  | 23  |
| 24  | 25  | 26  | 27  | 28  | 29  | 30  |

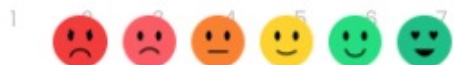

How are you feeling today?

**COVID-19 and HIV**

People with HIV may be more likely to become severely ill from COVID-19...

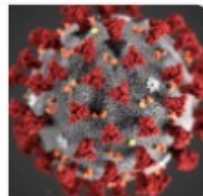

**Mental Health**

Mental health is an important part of overall health and well-being...

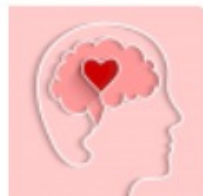

**Sex, Drugs, and Chemsex**

What is chemsex? The use of drugs to facilitate or enhance sexual pleasure...

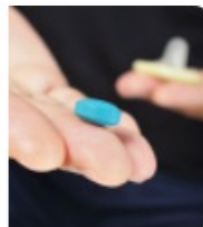

**Post Exposure Prophylaxis**

What is PEP? Post-exposure prophylaxis (PEP) means taking medicine t...

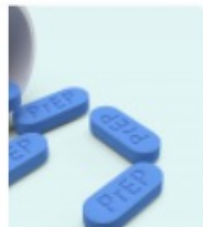

**Pre-Exposure Prophylaxis (PrEP)**

What is PrEP? Pre-exposure prophylaxis (PrEP) is

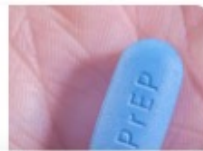

**A 'highly virulent' HIV strain is 'no cause for alarm,' scientists say**

An international research team has identified a highly virulent and...

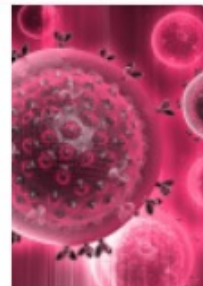

**HIV clinicians should ask gay men if they want to become fathers**

Healthcare professionals should avoid making assumptions about gay...

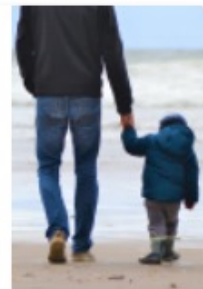

**New HIV Prevention Weapon: Injectable PrEP**

The U.S. Food and Drug Administration (FDA) last month approved a first-...

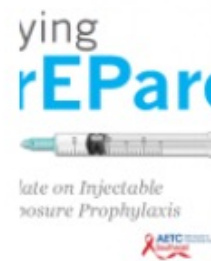

Supplement: mhealth_v11i1e44468_app1.pdf [file mhealth_v11i1e44468_app1.pdf]
